# Supplementary material for: First-principles investigations of vanadium disulfide for lithium and sodium ion battery applications
Source: Royal Society of Chemistry journal article supplement (doi:10.1039/c6ra07586j), 2016-01-01
Supplement: c6ra07586j1.pdf [file c6ra07586j1.pdf]

Supporting Information

First-Principle Investigations of Vanadium Disulfide for  
Lithium and Sodium Ion Battery Applications

Wenhui Wang<sup>1</sup>, Zhongti Sun<sup>1</sup>, Wenshuai Zhang<sup>2</sup>, Quanping Fan<sup>3</sup>, Qi Sun<sup>1</sup>, Xudong  
Cui<sup>4\*</sup>, Bin Xiang<sup>1\*</sup>

<sup>1</sup>Department of Materials Science & Engineering, CAS Key Lab of Materials for Energy Conversion, Synergetic Innovation Center of Quantum Information Quantum Physics, University of Science and Technology of China, Hefei, Anhui 230026, China.

<sup>2</sup>Network Information Center, Supercomputing Center, University of Science and Technology of China, Hefei 230026, China.

<sup>3</sup>Institute of Atomic and Molecular Physics, Sichuan University, Chengdu 610065, China.

<sup>4</sup>Science and Technology on Plasma Physics Laboratory, Research Center of Laser Fusion, CAEP, Sichuan, 621900, China.

\*Corresponding author: [binxiang@ustc.edu.cn](mailto:binxiang@ustc.edu.cn); [xudcui@163.com](mailto:xudcui@163.com)

Figures

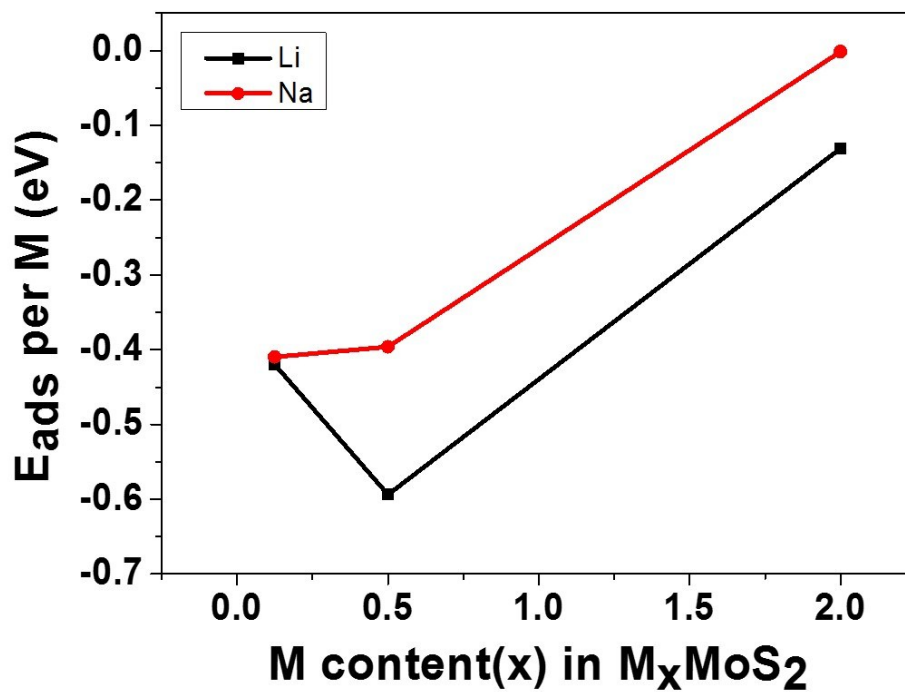

Figure S1. The adsorption energy of bulk  $MoS_2$  for lithium and sodium ions batteries

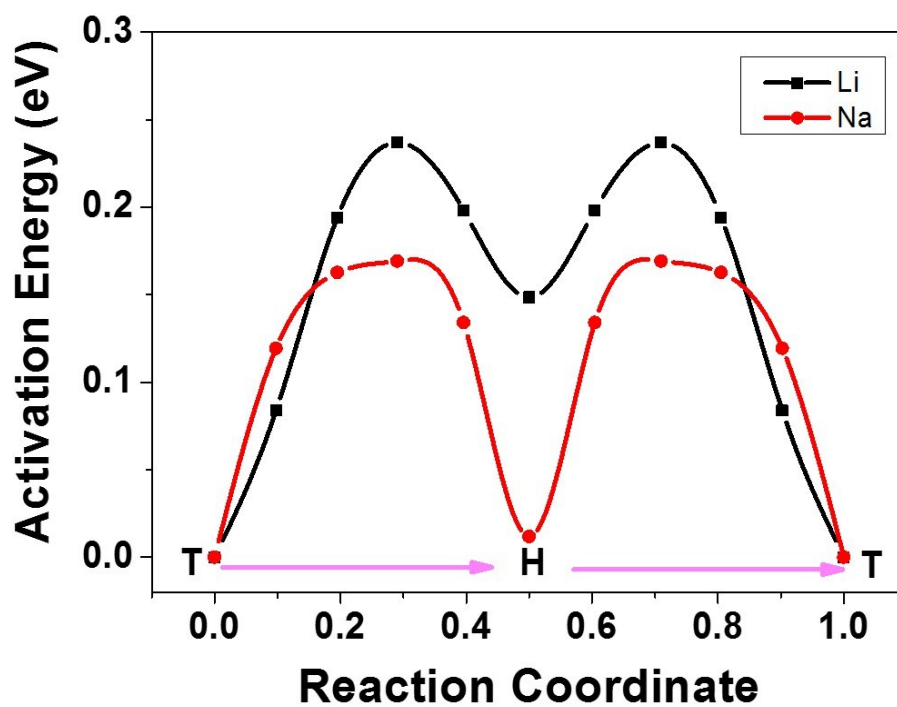

Figure S2. Activation energy barrier for the Li<sup>+</sup> and Na<sup>+</sup> diffusions in the monolayer MoS<sub>2</sub>

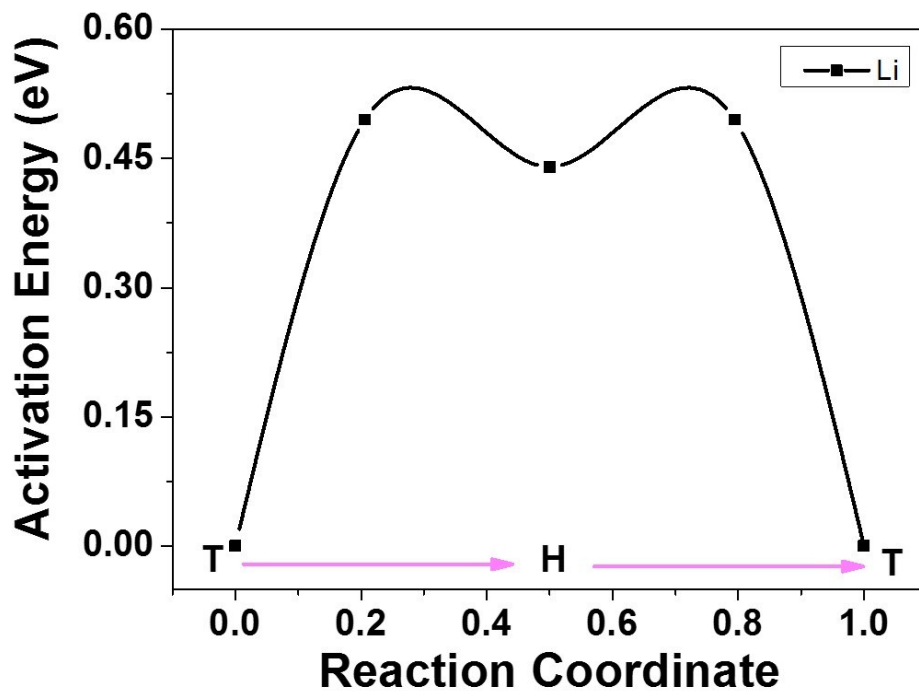

Figure S3. Activation energy barrier for the  $\text{Li}^+$  diffusion in the bulk

$\text{MoS}_2$

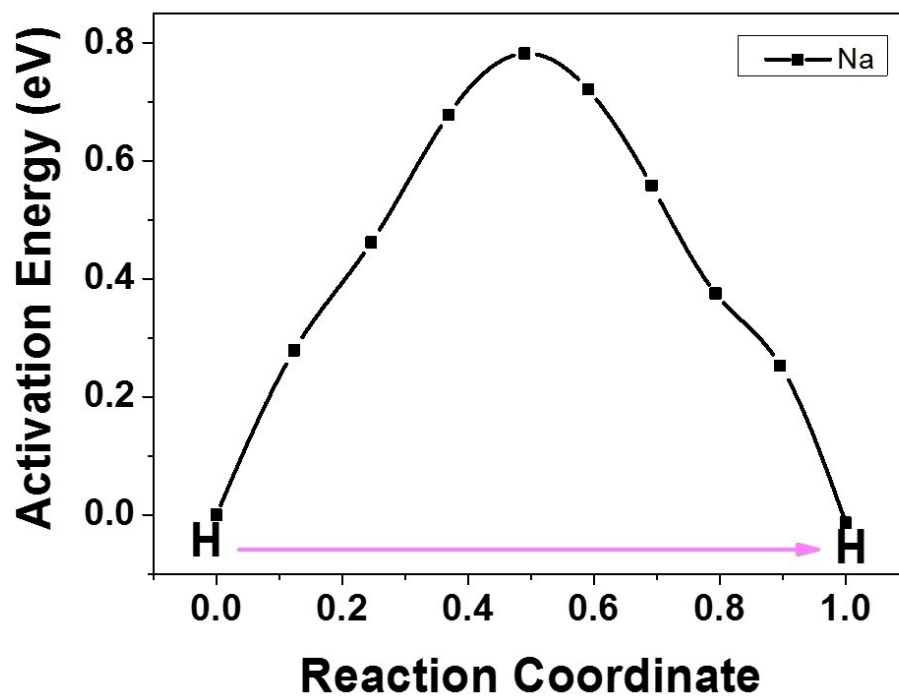

Figure S4. Activation energy barrier for the Na<sup>+</sup> diffusion in the bulk

MoS<sub>2</sub>
